# Supplementary material
Source: Springer Nature journal article supplement (https://www.springermedizin.de/resource/supplementary/12978_2011_120_MOESM1_ESM.pdf/9602896)

Area under curve = 0.9065 se(area) = 0.0153

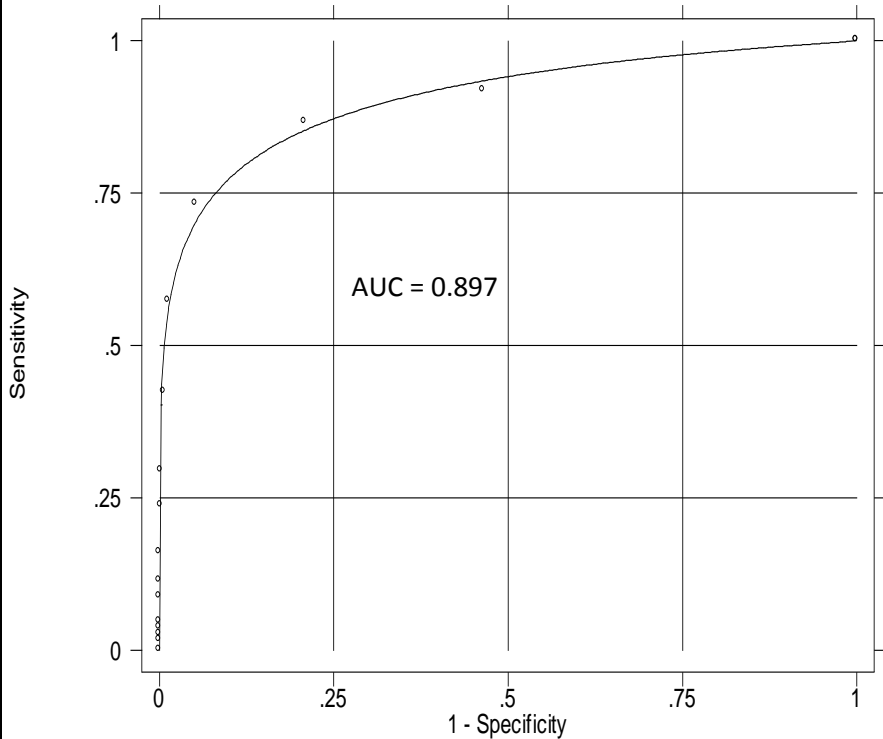

Supplement: MOESM1 [file 9602896]
